# Supplementary material for: Multi-Targeting Approach in Glioblastoma Using Computer-Assisted Drug Discovery Tools to Overcome the Blood–Brain Barrier and Target EGFR/PI3Kp110β Signaling
Source: MDPI journal article supplement (doi:10.3390/cancers14143506), 2022-07-19
Supplement: s1 [file s1]

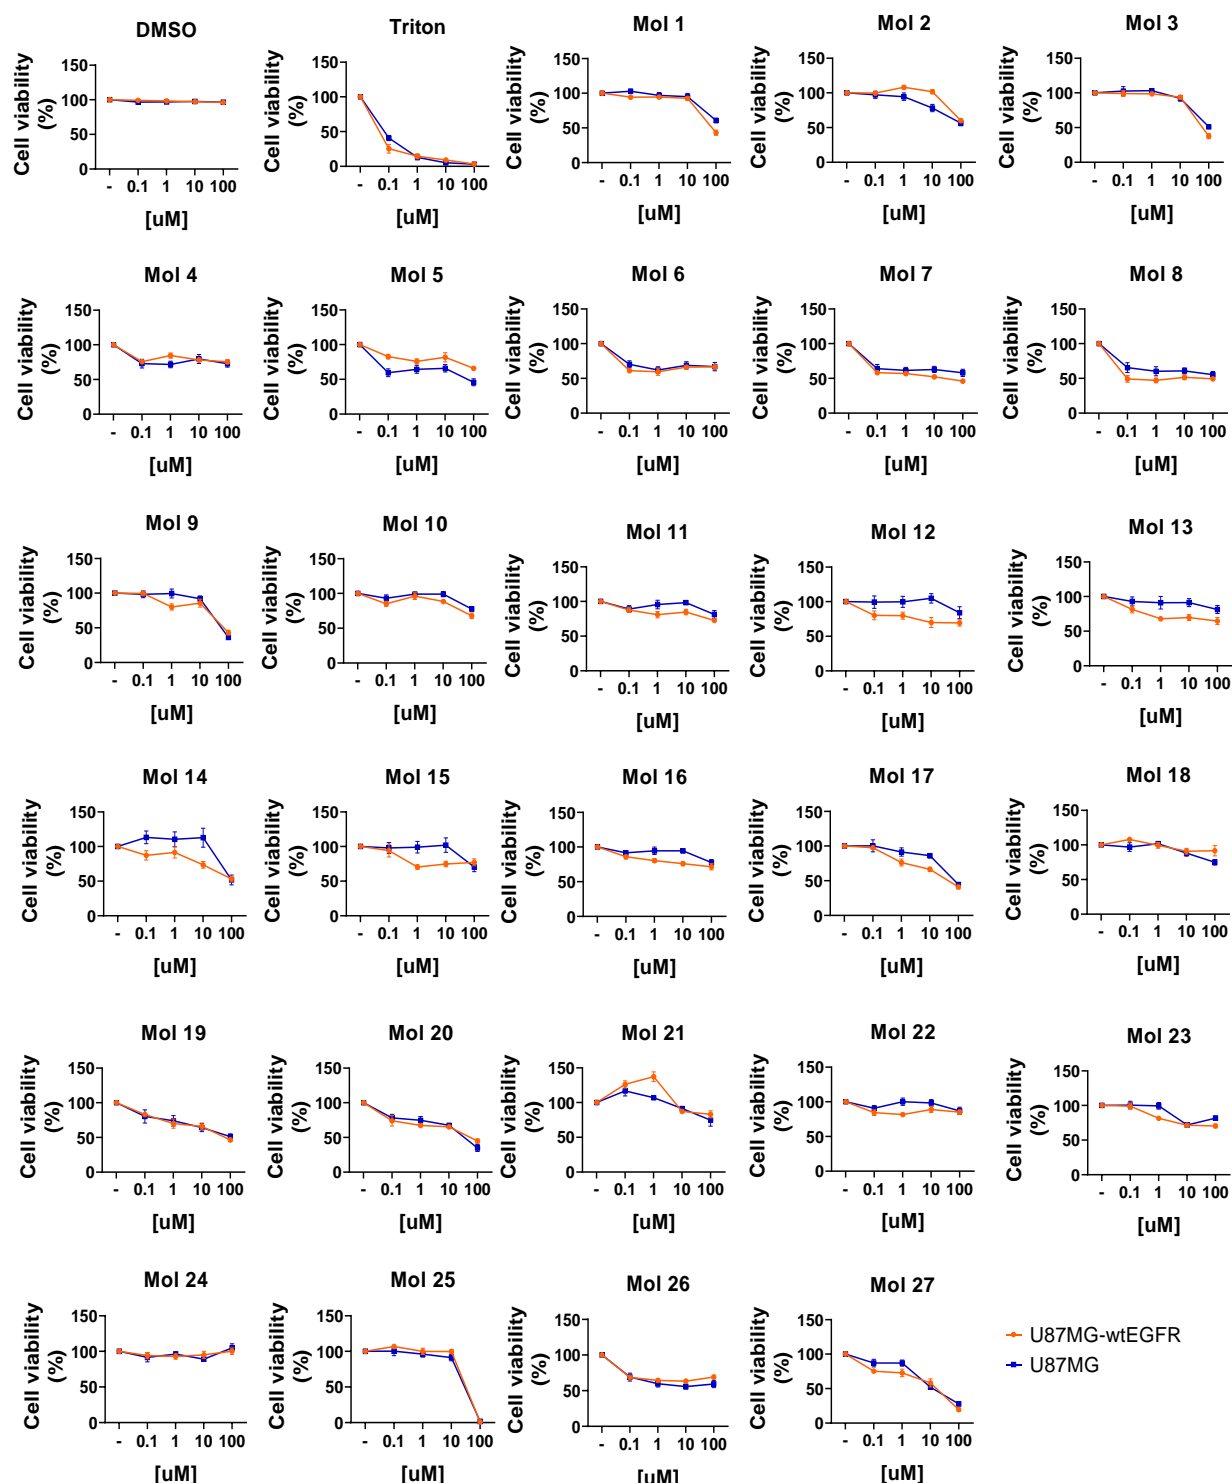

**Supplementary Figure S1. Cell viability analysis of U87MG and U87MG-wtEGFR cell lines treated with *in silico* discovered molecules (Mol) allowed the selection of six highly cytotoxic candidates.** Both U87MG (blue) and U87MG-wtEGFR (orange) cell lines were incubated for 24 h with 0.1, 1, 10 or 100  $\mu$ M of EGFR inhibitors (Mol 1-18), PI3Kp110 $\beta$  inhibitors (Mol 19-24), dual target inhibitors (Mol 25-27), or vehicle (control). Cell viability was assessed by MTT assay and the values are presented as percentage relatively to the control. Mol 8, 17, 19, 20, 25 and 27 were selected for further studies since they caused  $\geq 50\%$  of cell death in both cell lines. All values are means  $\pm$  SEM of three independent experiments performed in triplicate.

**A.**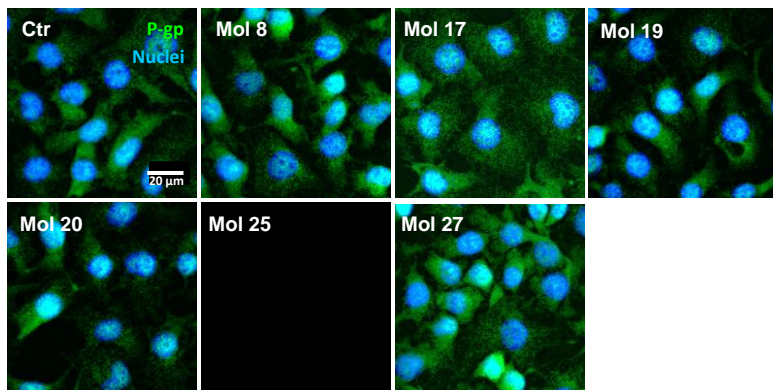**B.**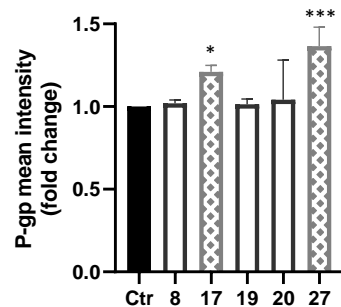

**Supplementary Figure S2. HBMEC efflux activity point to molecules 17 and 27 as substrate of P-gp while molecules 8, 19 and 20 were not associated with an active efflux out of the brain.** HBMEC were incubated with selected molecules (8, 17, 19, 20, 25 and 27) at U87MG EC<sub>50</sub>, or vehicle (control). **(A)** Immunostaining of HBMEC for P-gp and nuclei labeling with Hoescht 33342 after 9h of incubation. Images are representative of three independent experiments each with 10 random fields analyzed. **(B)** Semi-quantitative analysis of P-gp expression in treated cells vs. control by fluorescence mean intensity fold-change. Increased P-gp expression is represented by pattern-filled bars. Data are presented as means  $\pm$  SEM of three independent experiments. The statistical analysis for all experiments was performed by one-way ANOVA with Tuckey correction. \*P<0.05, \*\*\*P<0.001 vs. control.

**Supplementary Table S1.** Description of training datasets for each selected chemical problem.

| Uniprot ID | Property/Target Protein Name | Origin of dataset | Associated bioactivities | Total number of observations (N-retrieved) | Selected number of observations (N-processed) |
|------------|------------------------------|-------------------|--------------------------|--------------------------------------------|-----------------------------------------------|
| -          | BBB's permation              | oChem             | LogBB                    | 3244                                       | 975                                           |
| P00533     | EGFR                         | ChEMBL            | IC <sub>50</sub>         | 8479                                       | 7134                                          |
| P42338     | PI3Kp110β                    | ChEMBL            | IC <sub>50</sub>         | 2416                                       | 1870                                          |

Data was searched until Dez 2019.

**Supplementary Table S2.** Description of crystallographic structures selected from PDB for each protein target.

| Target | PDB code | Resolution X-ray diffraction | Length  | Non-water Atoms | Theoretical Weight | Source Organism | Structure domain         | Chain |
|--------|----------|------------------------------|---------|-----------------|--------------------|-----------------|--------------------------|-------|
| EGFR   | 1xkk     | 2.4Å                         | 352 aa  | 2299            | 40.32 KDa          | Homo sapiens    | Kinase catalytic subunit | A     |
|        | 3w2s     | 1.9Å                         | 330 aa  | 2544            | 37.56 KDa          |                 |                          |       |
|        | 3poz     | 1.5Å                         | 327 aa  | 2410            | 37.3 KDa           |                 |                          |       |
|        | 5u8l     | 1.6Å                         | 329 aa  | 2410            | 37.58 kDa          |                 |                          |       |
| PI3K   | 2y3a     | 3.3Å                         | 1092 aa | 9848            | 125.24 KDa         | Mus musculus    | Catalytic subunit p110β  | A     |
|        | 4bfr     | 2.8Å                         | 952 aa  | 13697           | 109 kDa            |                 |                          |       |

Data was accessed until March 2020 in <http://www.rcsb.org>.
